# Supplementary material for: Self-crosslinked polyvinyl alcohol/cellulose nanofibril cryogels loaded with synthesized aminophosphonates as antimicrobial wound dressings
Source: Royal Society of Chemistry journal article supplement (doi:10.1039/d3tb00926b), 2023-01-01
Supplement: d3tb00926b1.pdf [file d3tb00926b1.pdf]

## Self-crosslinked Polyvinyl alcohol/cellulose nanofibrils cryogels loaded with synthesized aminophosphonates as antimicrobial wound dressings

Dalia A. Elsherbiny<sup>1,2</sup>, Abdelrahman M. Abdelgawad<sup>3,4,5\*</sup>, Bahaa A. Hemdan<sup>6</sup>, Ahmed S. Montaser<sup>3</sup>, Ibrahim El-Tantawy El-Sayed<sup>1</sup>, Stefan Jockenhövel<sup>2,7</sup>, and Samaneh Ghazanfari<sup>\* 2,7</sup>

<sup>1</sup> Department of Chemistry, Faculty of Science, Menoufia University, Egypt

<sup>2</sup> Aachen-Maastricht Institute for Biobased Materials, Faculty of Science and Engineering, Maastricht University, the Netherlands

<sup>3</sup> Textile Research and Technology Institute, National Research Centre (Affiliation ID: 60014618), Dokki, Cairo, Egypt

<sup>4</sup> Textile Engineering Chemistry and Science Department, Wilson College of Textiles, North Carolina State University, Raleigh, NC, USA

<sup>5</sup> Chemistry Department, Faculty of Science, New Mansoura University, New Mansoura City 35511, Egypt

<sup>6</sup> Water Pollution Research Department, National Research Centre, 33 El-Bohouth St., Dokki, Giza 12622, Egypt

<sup>7</sup> Department of Biohybrid & Medical Textiles (BioTex), AME-Helmholtz Institute for Biomedical Engineering, RWTH Aachen University, Forckenbeckstrabe 55, 52072 Aachen, Germany

Corresponding author: Abdelrahman M. Abdelgawad ([aabdelg@ncsu.edu](mailto:aabdelg@ncsu.edu)) and Dr. Samaneh Ghazanfari ([Samaneh.ghazanfari@maastrichtuniversity.nl](mailto:Samaneh.ghazanfari@maastrichtuniversity.nl))

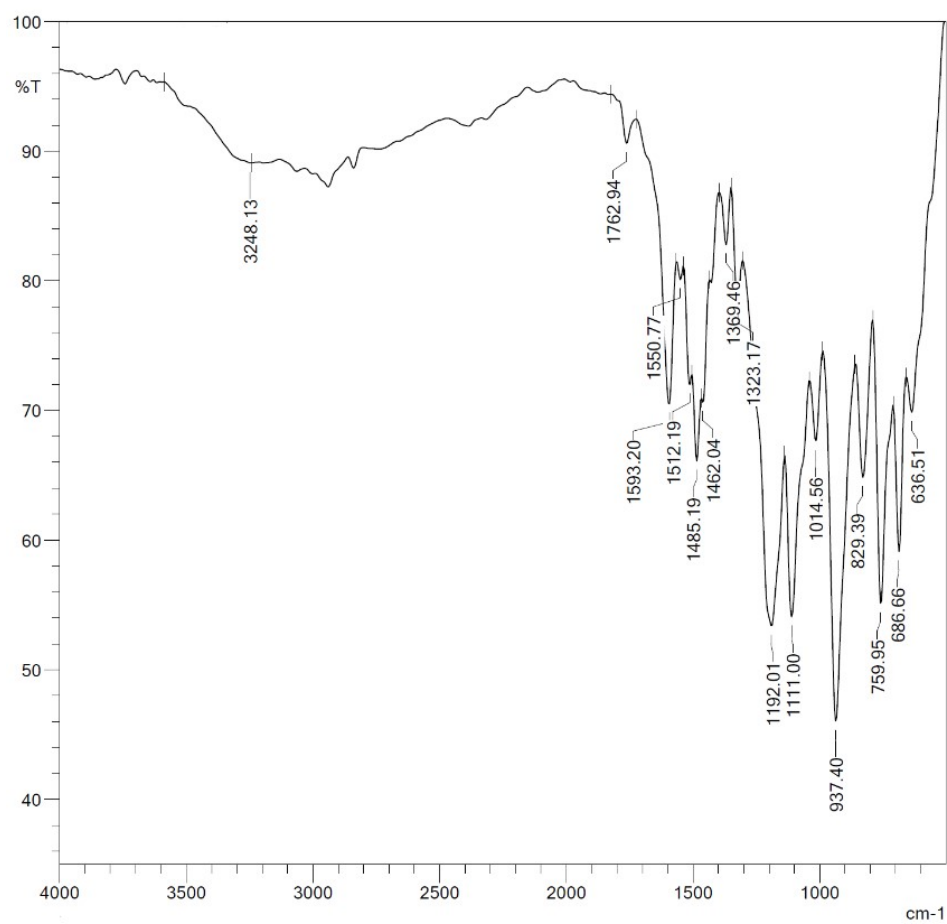

Figure S1: FTIR of diphenyl (((4-(4-chlorophenyl)thiazol-2-yl)amino)(4-hydroxy-3,5-dimethoxyphenyl)methyl)phosphonate (5)

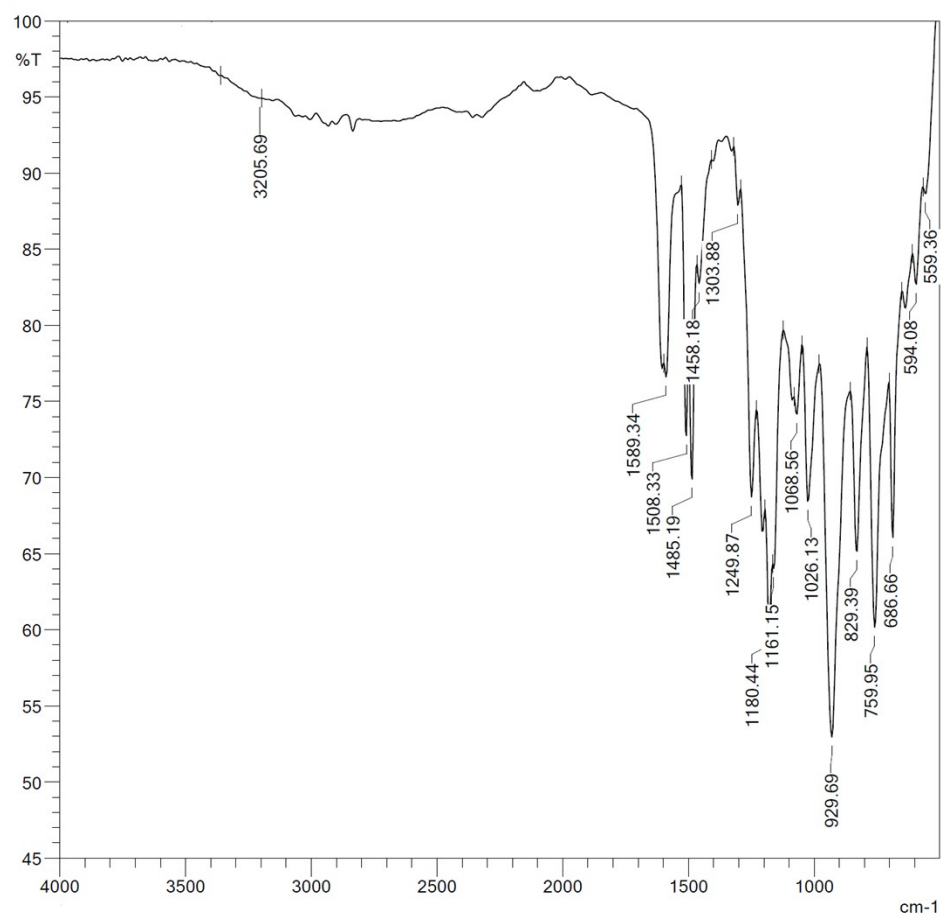

Figure S2: FTIR of diphenyl (((4-(4-chlorophenyl)thiazol-2-yl)amino)(4-methoxyphenyl)methyl)phosphonate (6)

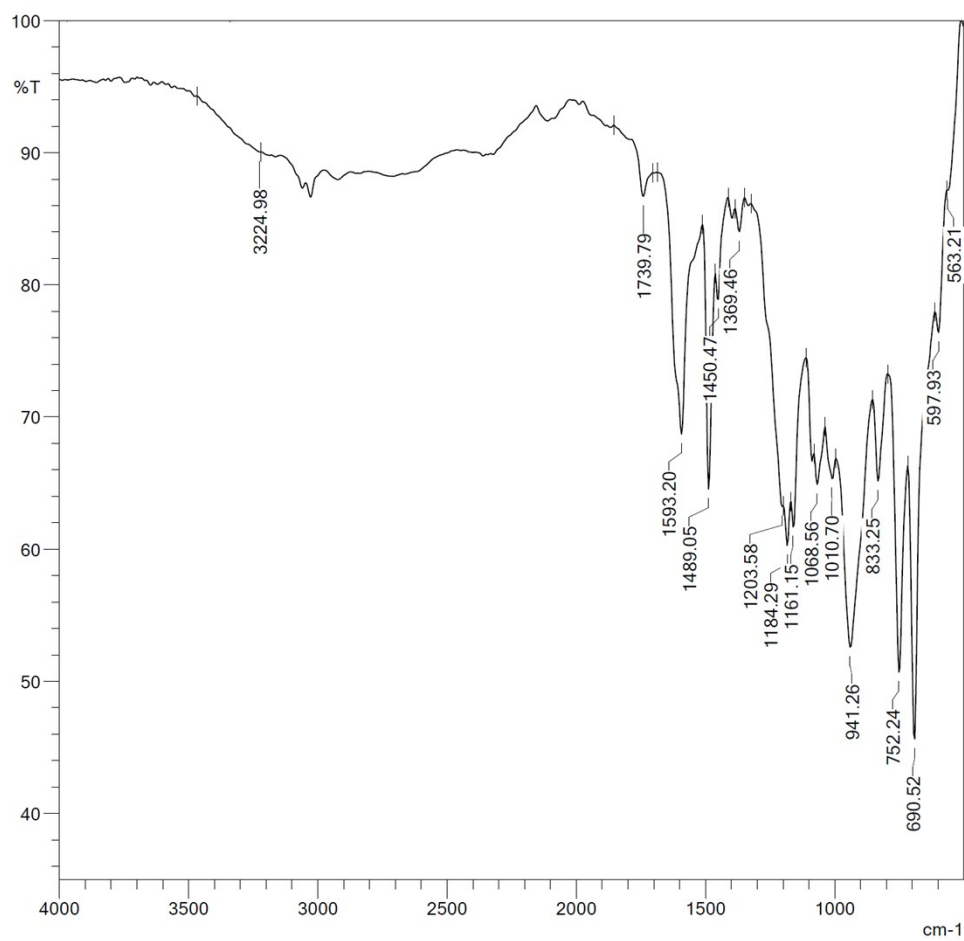

Figure S3: FTIR of diphenyl (1-((4-(4-chlorophenyl)thiazol-2-yl)amino)-2-phenylethyl)phosphonate (7)

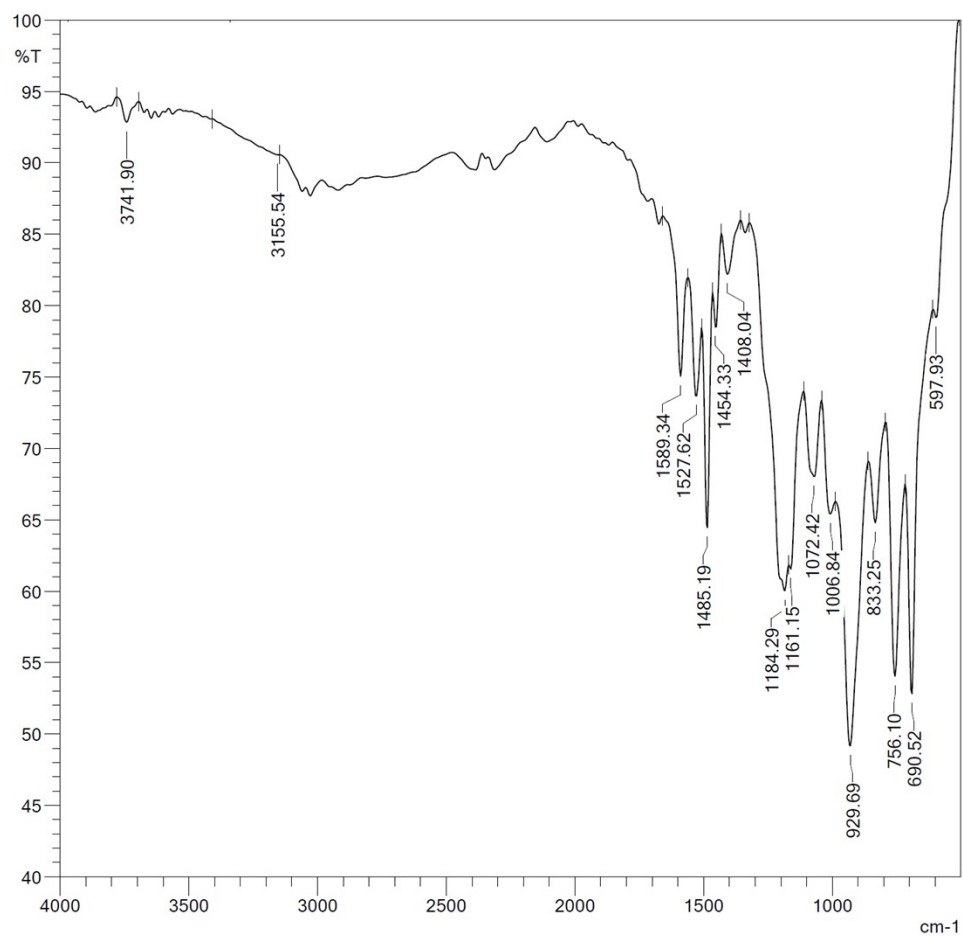

Figure S4: FTIR of diphenyl (E)-(1-((4-(4-chlorophenyl)thiazol-2-yl)amino)-3-phenylallyl)phosphonate (8)

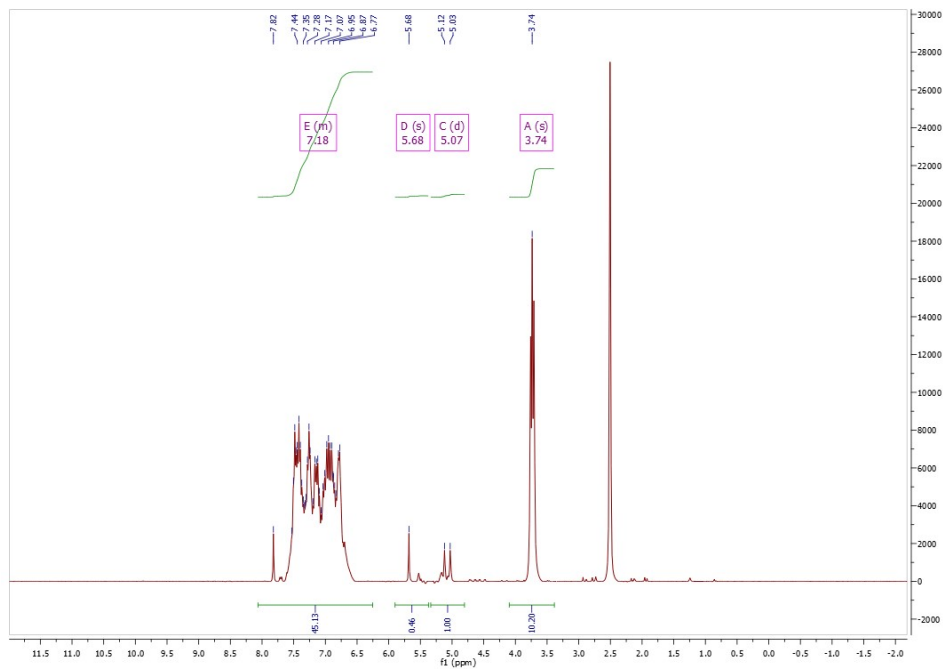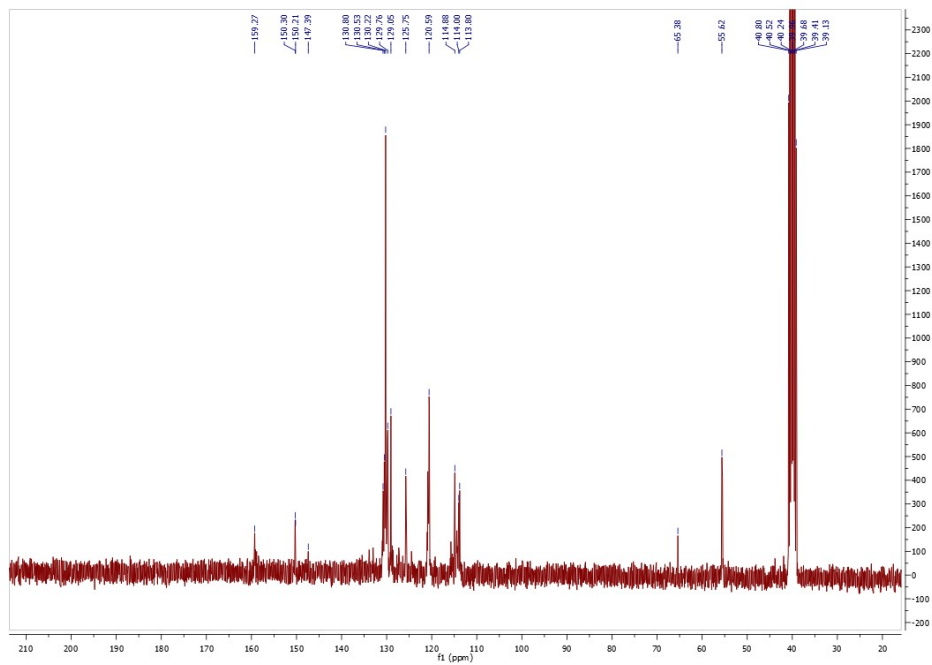

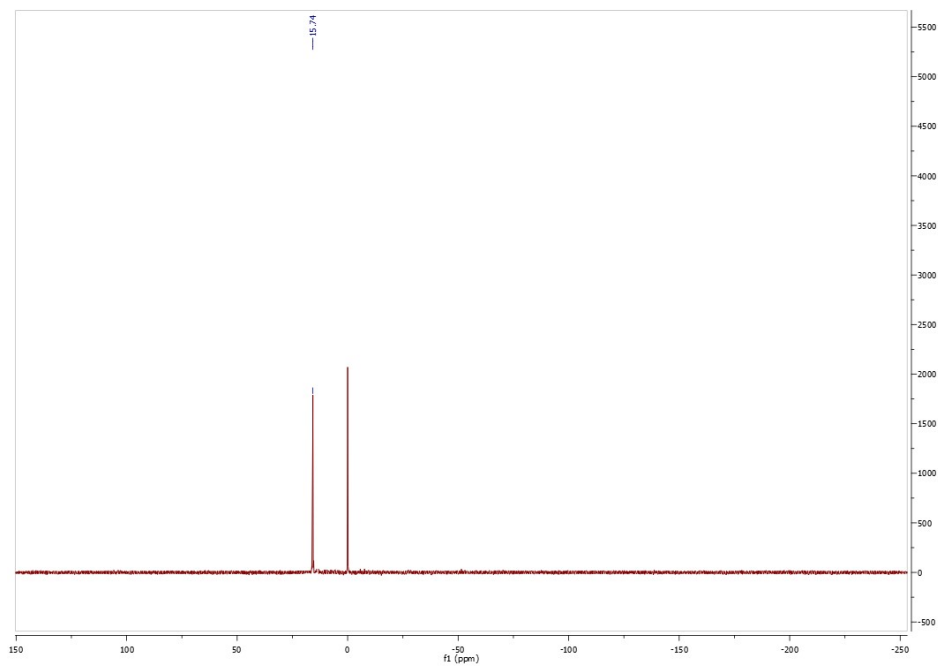

Figure S5:  $^1\text{H}$ -NMR,  $^{13}\text{C}$ -NMR AND  $^{31}\text{P}$ -NMR of Compound (5)

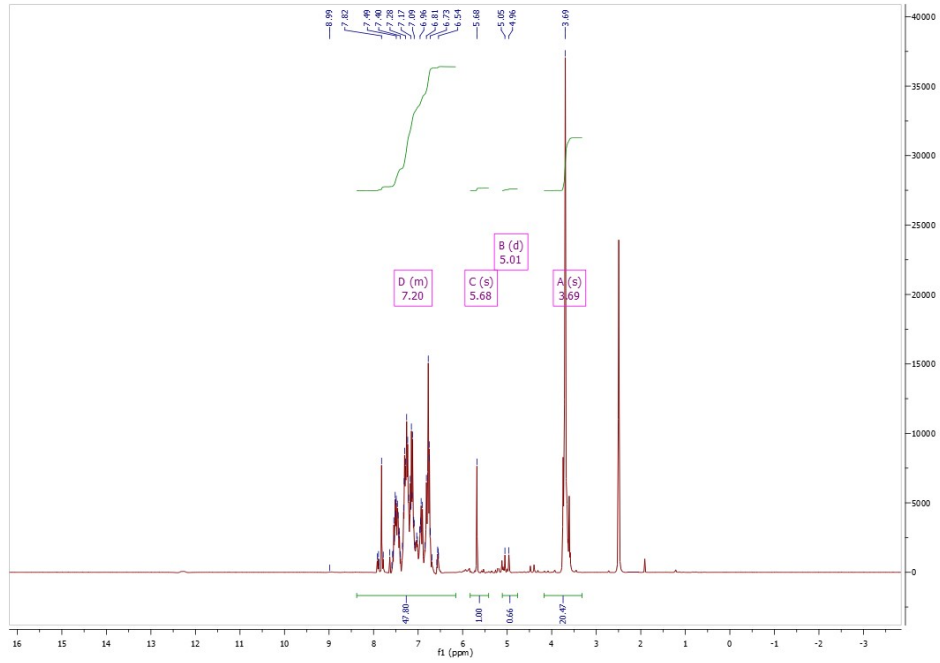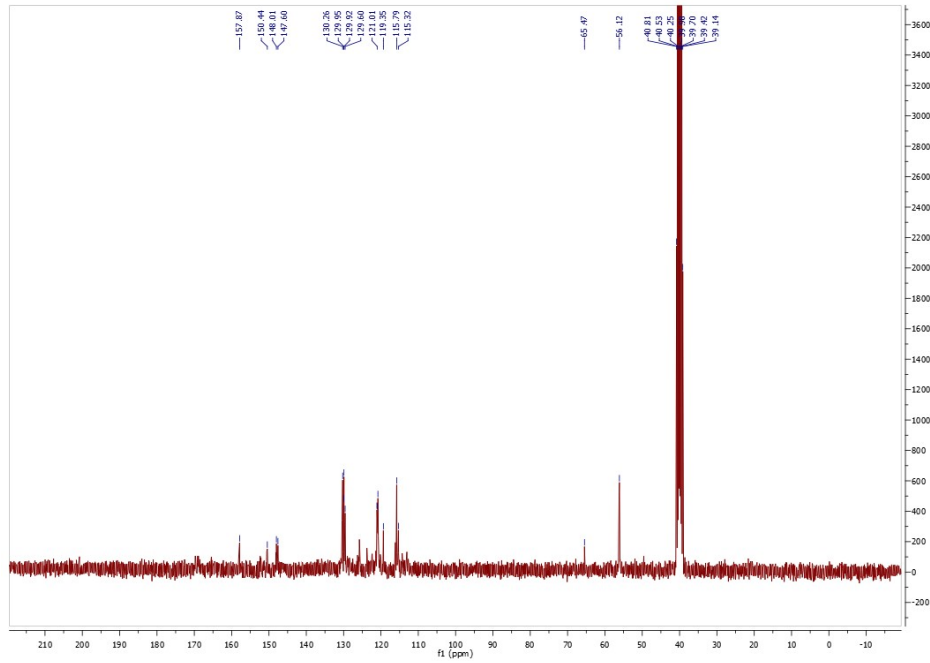



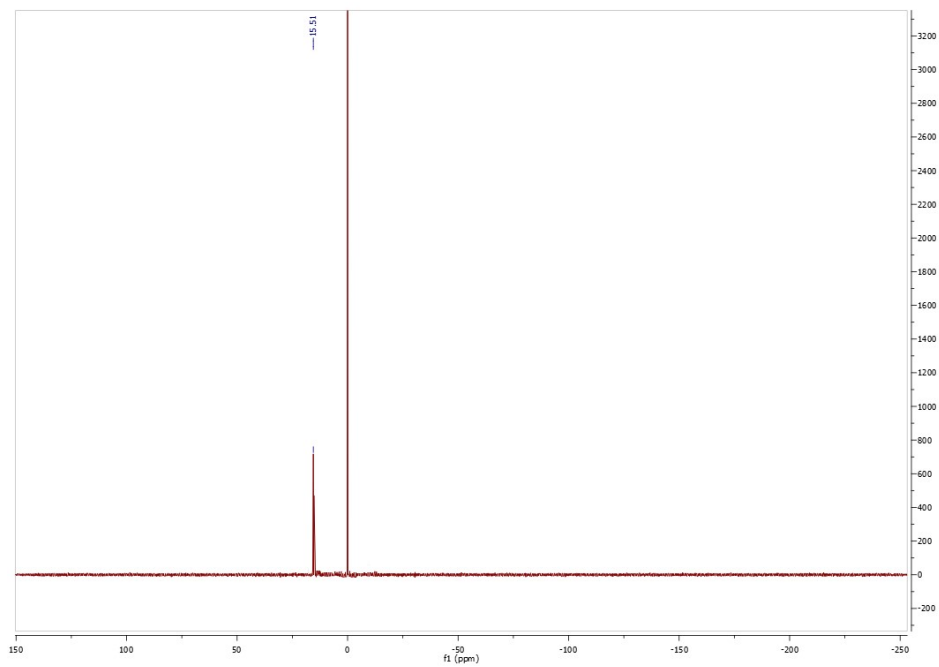

Figure S6:  $^1\text{H}$ -NMR,  $^{13}\text{C}$ -NMR AND  $^{31}\text{P}$ -NMR of Compound (6)

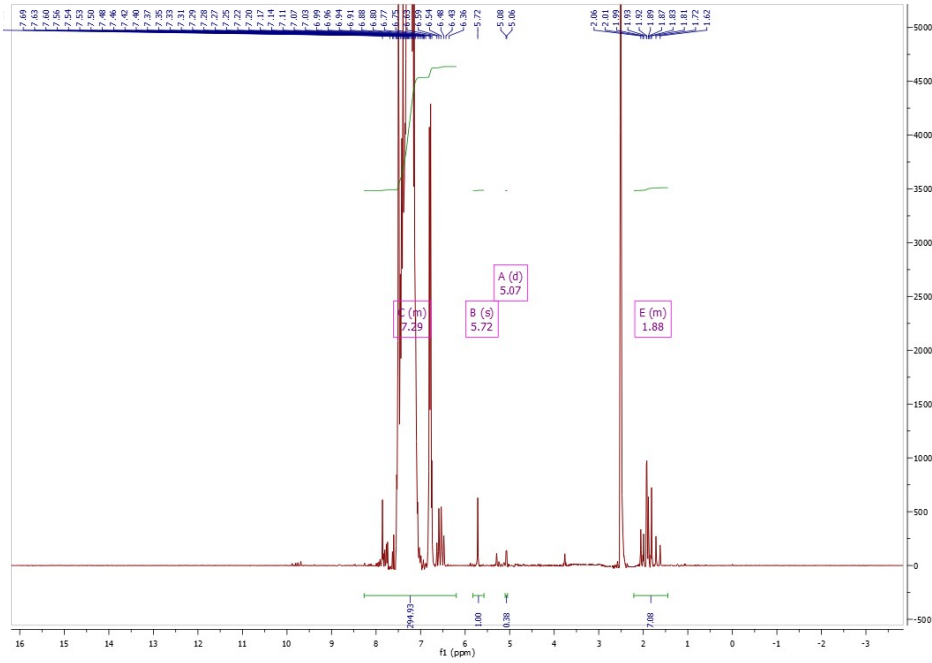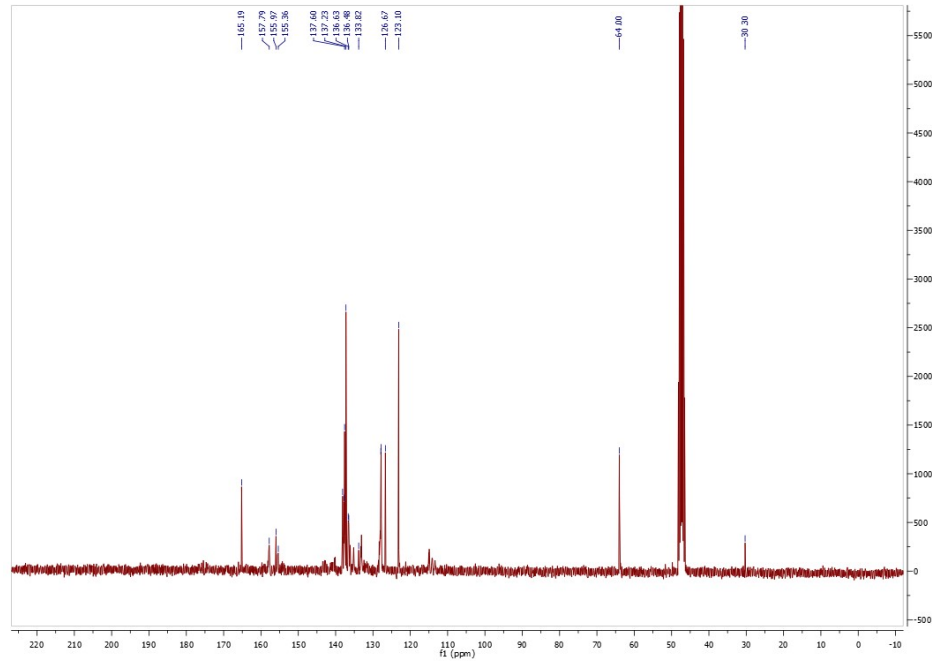

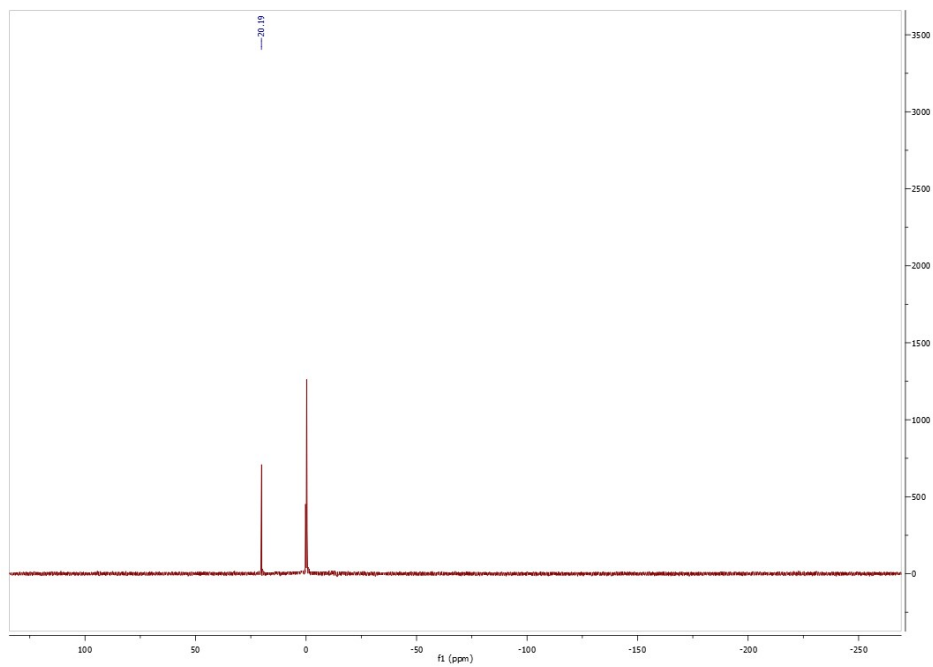

Figure S7:  $^1\text{H}$ -NMR,  $^{13}\text{C}$ -NMR AND  $^{31}\text{P}$ -NMR of Compound (7)

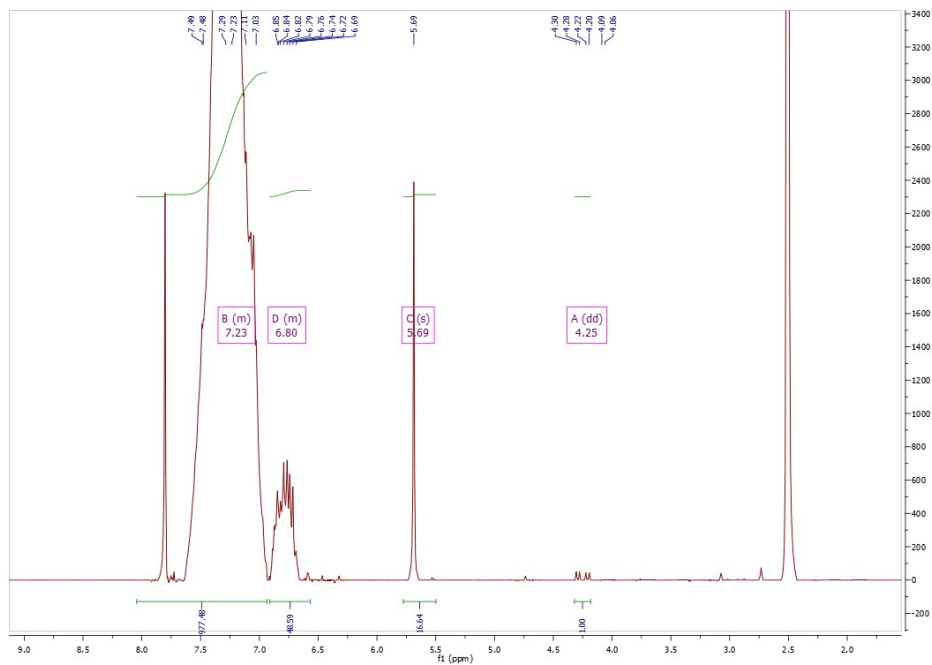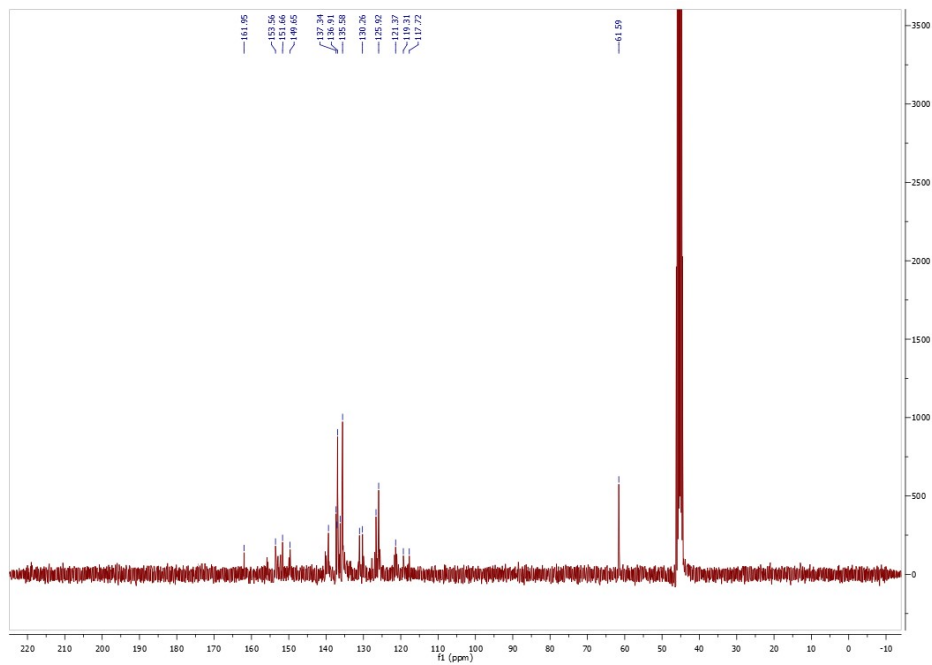

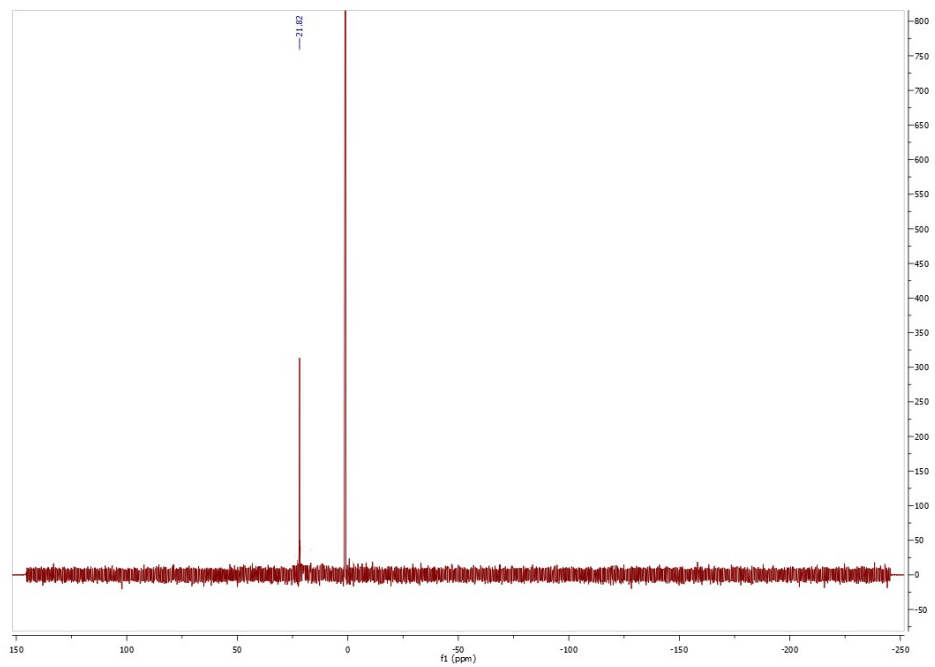

Figure S8:  $^1\text{H}$ -NMR,  $^{13}\text{C}$ -NMR AND  $^{31}\text{P}$ -NMR of Compound (8)

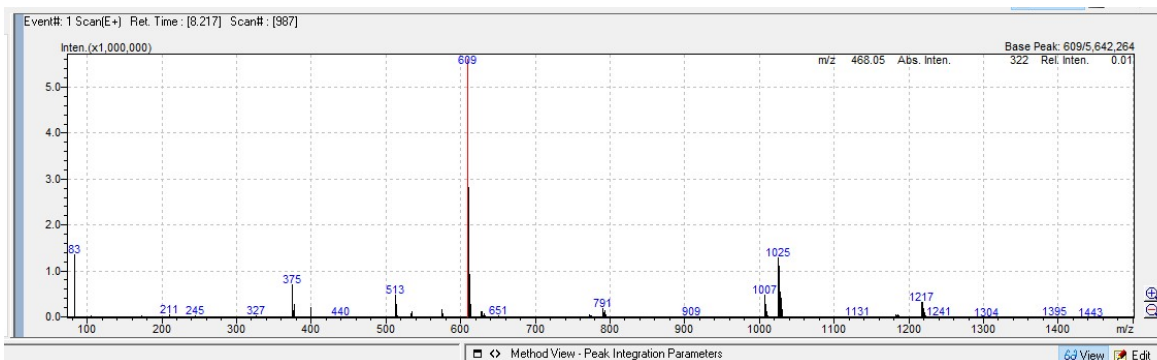

Figure S9: Mass Spec. of compound (5)

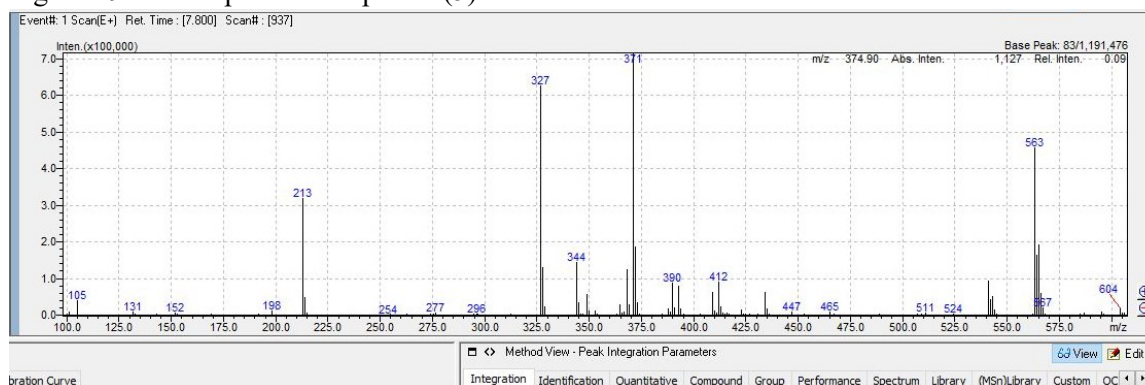

Figure S10: Mass Spec. of compound (6)

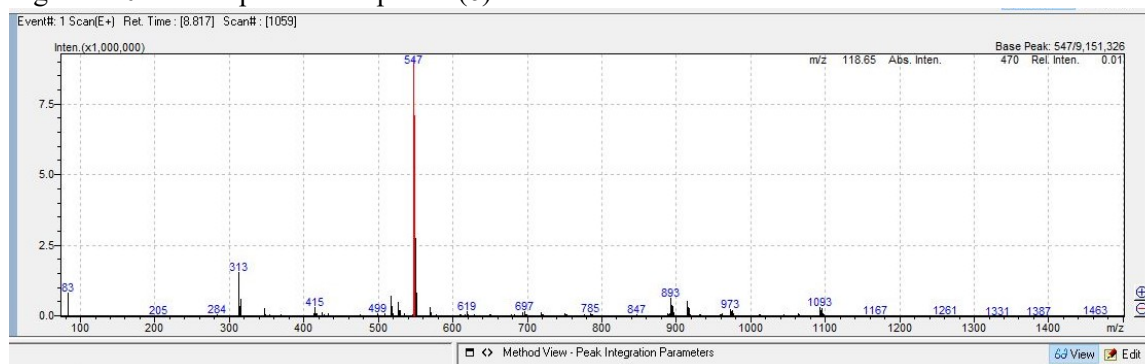

Figure S11: Mass Spec. of compound (7)

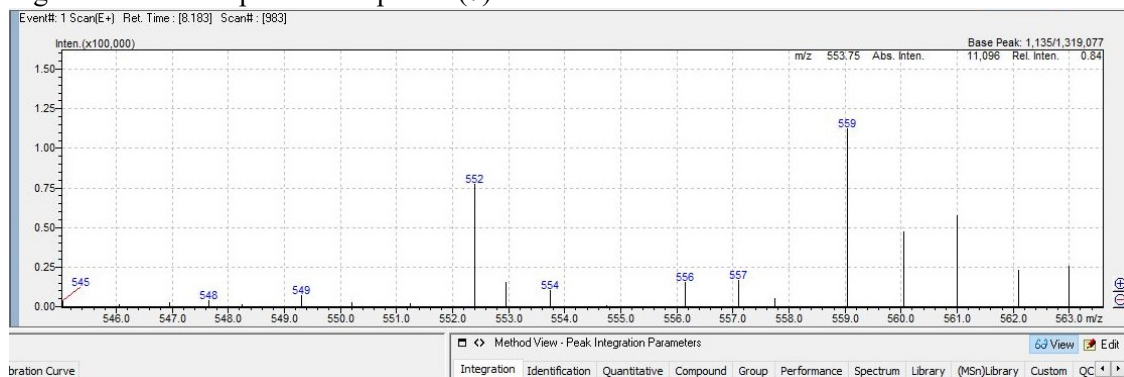

Figure S12: Mass Spec. of compound (8)
